# Supplementary material for: Infectious Inflammatory Processes and the Role of Bioactive Agent Released from Imino-Chitosan Derivatives Experimental and Theoretical Aspects
Source: MDPI journal article supplement (doi:10.3390/polym14091848), 2022-04-30
Supplement: s1 [file s1]

# Infectious Inflammatory Processes and the Role of Bioactive Agent Released from Imino-Chitosan Derivatives Experimental and Theoretical Aspects

Loredana Himiniuc <sup>1</sup>, Razvan Socolov <sup>2</sup>, Vlad Ghizdov <sup>3</sup>, Maricel Agop <sup>4,5,\*</sup>, Emil Anton <sup>2</sup>, Bogdan Toma <sup>1</sup>,  
Lacramioara Ochiuz <sup>6</sup>, Decebal Vasincu <sup>7</sup>, Ovidiu Popa <sup>8</sup> and Viviana Onofrei <sup>9</sup>

**Citation:** Himiniuc, L.; Socolov, R.; Ghizdov, V.; Agop, M.; Anton, E.; Toma, B.; Ochiuz, L.; Vasincu, D.; Popa, O.; Onofrei, V. Infectious Inflammatory Processes and the Role of Bioactive Agent Released from Imino-Chitosan Derivatives Experimental and Theoretical Aspects. *Polymers* **2022**, *14*, x. <https://doi.org/10.3390/xxxxx>

Academic Editor(s): Andrea Sorrentino

Received: 17 February 2022

Accepted: 21 April 2022

Published: date

**Publisher's Note:** MDPI stays neutral with regard to jurisdictional claims in published maps and institutional affiliations.

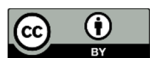

**Copyright:** © 2022 by the authors. Submitted for possible open access publication under the terms and conditions of the Creative Commons Attribution (CC BY) license (<https://creativecommons.org/licenses/by/4.0/>).

- <sup>1</sup> “Grigore T. Popa” University of Medicine and Pharmacy Iasi, 700115 Iasi, Romania; loredana.himiniuc@umfiasi.ro (L.H.); bogdan.toma@umfiasi.ro (B.T.)
  - <sup>2</sup> Department of Obstetrics and Gynecology, “Grigore T. Popa” University of Medicine and Pharmacy Iasi, 700115 Iasi, Romania; razvan.socolov@umfiasi.ro (R.S.); emil.anton@umfiasi.ro (E.A.)
  - <sup>3</sup> Department of Biophysics and Medical Physics, “Grigore T. Popa” University of Medicine and Pharmacy Iasi, 700115 Iasi, Romania; vlad.ghizdov@umfiasi.ro
  - <sup>4</sup> Department of Physics, “Gheorghe Asachi” Technical University of Iasi, 700050 Iasi, Romania
  - <sup>5</sup> Academy of Romanian Scientists, 050094 Bucharest, Romania
  - <sup>6</sup> Department of Pharmaceutical and Biotechnological Drug Industry, “Grigore T. Popa” University of Medicine and Pharmacy, 700115 Iasi, Romania; lacramioara.ochiuz@umfiasi.ro
  - <sup>7</sup> Department of Dental and Oro-Maxillo-Facial Surgery, “Grigore T. Popa” University of Medicine and Pharmacy, 700115 Iasi, Romania; decebal.vasincu@umfiasi.ro
  - <sup>8</sup> Department of Emergency Medicine, “Grigore T. Popa” University of Medicine and Pharmacy, 700115 Iasi, Romania; ovidiu.popa@umfiasi.ro
  - <sup>9</sup> Department of Internal Medicine (Cardiology), “Grigore T. Popa” University of Medicine and Pharmacy, 700115 Iasi, Romania; viviana.aursulesei@umfiasi.ro
- \* Correspondence: magop@tuiasi.ro

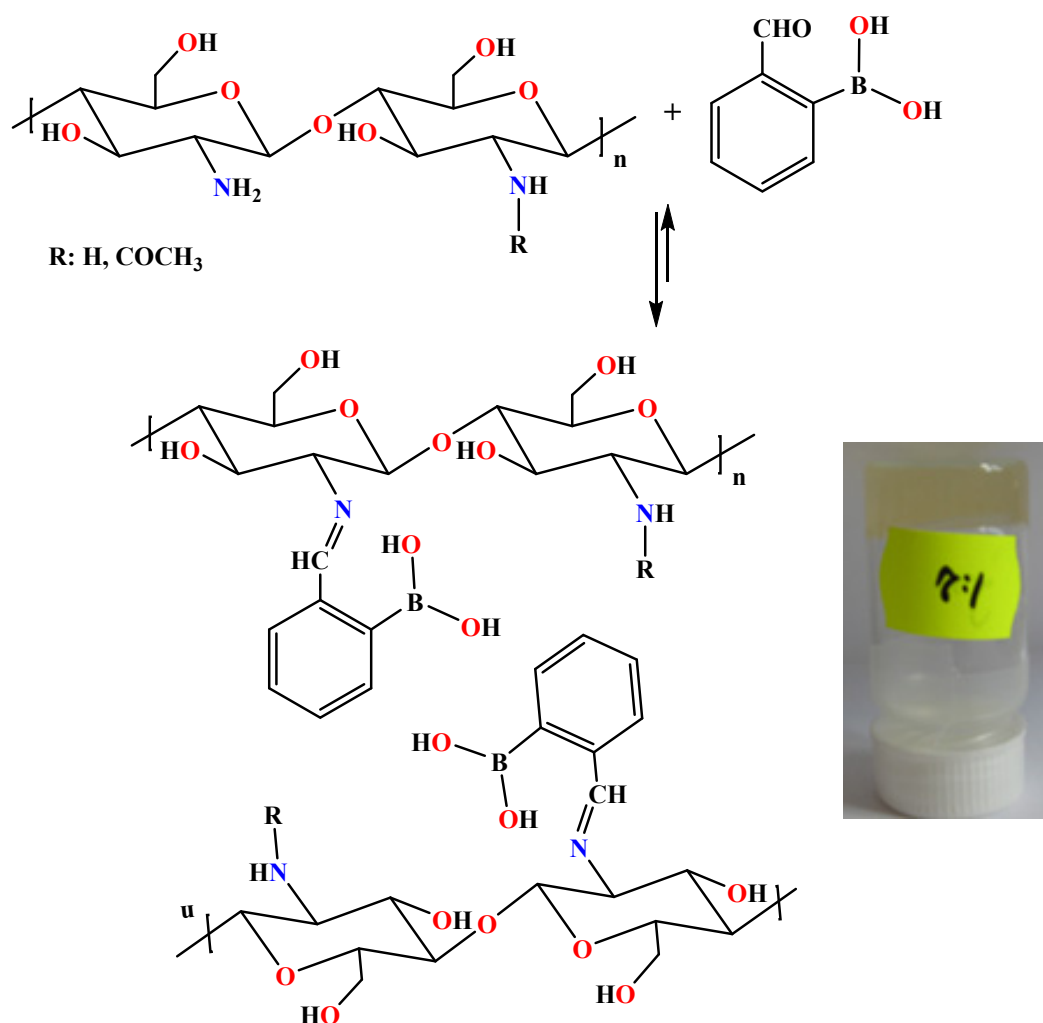

**Figure S1.** Schematic representation of the synthesis of studied hydrogels, highlighting the imine units and the organization of the imine-chitosan chains to form the hydrogel.

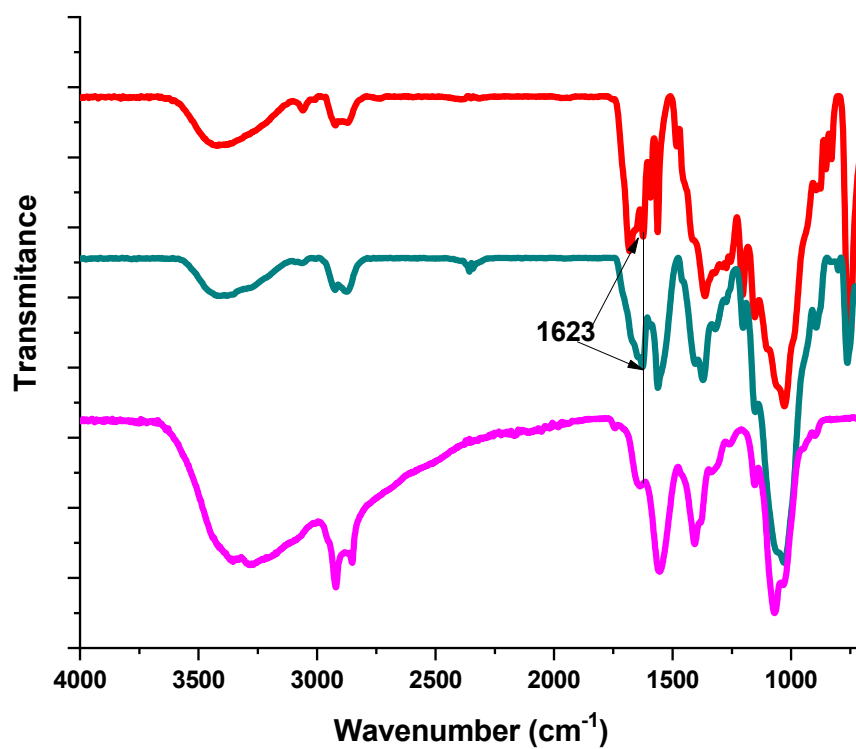

**Figure S2.** FTIR spectra of chitosan (magenta), **H0.071** (cyan) and **H0.142** (red), proving the occurrence of imine units in hydrogels by characteristic vibration band at 1623 cm<sup>-1</sup>.
